# Supplementary material for: Landscape genetics reveal broad and fine‐scale population structure due to landscape features and climate history in the northern leopard frog (Rana pipiens) in North Dakota
Source: PubMed Central journal article supplement (PMC6374656; doi:10.1002/ece3.4745), 2019-01-15
Supplement: ECE3-9-1041-s001.pdf [file ECE3-9-1041-s001.pdf]

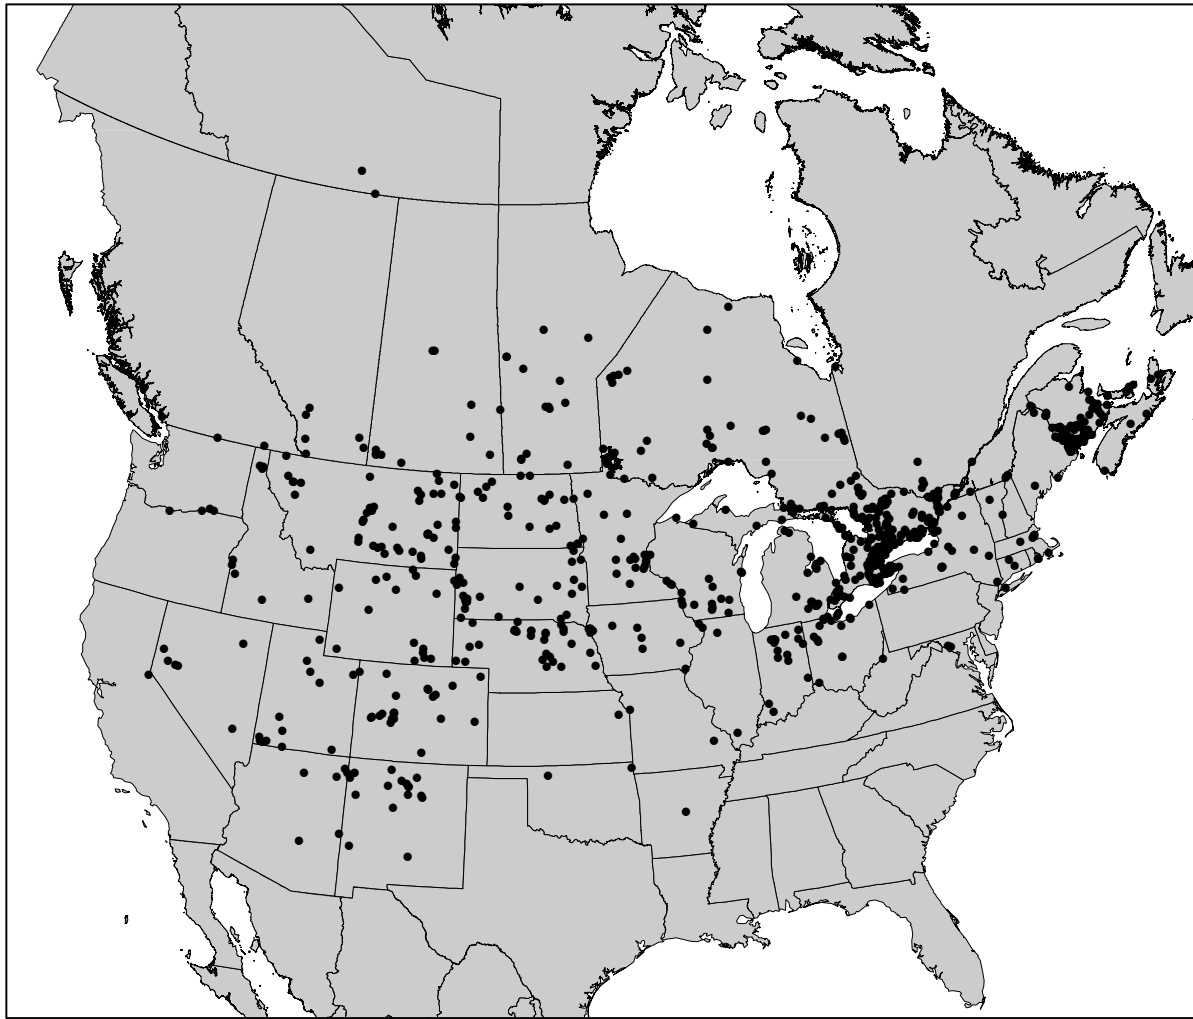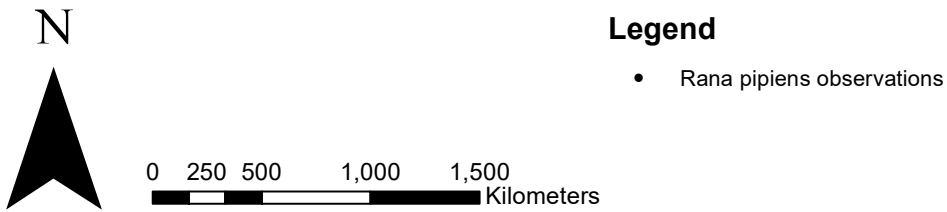

1  
2 Supporting Information S1. Map of the 801 observation points of *Rana pipiens* from the VertNet  
3 database after filtering for erroneous records, duplicates, fossil records, and captive records.  
4 These were the presence points use to build the species distribution models.
